# Supplementary material for: Burden of nosocomial COVID-19 in Wales: results from a multicentre retrospective observational study of 2508 hospitalised adults
Source: HighWire-hosted journal article supplement (doi:10.1136/thoraxjnl-2021-216964), 2021-07-22
Supplement: thoraxjnl-2021-216964supp001_data_supplement.pdf [file thoraxjnl-2021-216964supp001_data_supplement.pdf]

**Supplementary material to “The burden of nosocomial covid-19 in Wales: results from a multi-centre retrospective observational study of 2508 hospitalised adults.”**

**Table of Contents**

|                                                                                                                                                                                                          |           |
|----------------------------------------------------------------------------------------------------------------------------------------------------------------------------------------------------------|-----------|
| <b>Supplementary S1: List of participating centres .....</b>                                                                                                                                             | <b>2</b>  |
| <b>Supplementary S2: Commonly used case definitions for probable covid-19 origin. ....</b>                                                                                                               | <b>3</b>  |
| <b>Supplementary S3: Study flowchart.....</b>                                                                                                                                                            | <b>4</b>  |
| <b>Supplementary S4: Monthly prevalence of nosocomial infection diagnosis.....</b>                                                                                                                       | <b>5</b>  |
| <b>Supplementary S5: Random effects model for relative risk of mortality by covid-19 origin and site .....</b>                                                                                           | <b>6</b>  |
| <b>Supplementary S6: Mortality by age-group and covid-19 infection source .....</b>                                                                                                                      | <b>7</b>  |
| <b>Supplementary S7: Effect of varying diagnostic cut-off on burden of nosocomial infection .</b>                                                                                                        | <b>8</b>  |
| <b>Supplementary S8: Effect of varying case definitions on prevalence and crude mortality rate for community- and nosocomial- SARS-CoV-2 infection.....</b>                                              | <b>9</b>  |
| <b>Supplementary S9: Comparison of community-acquired and nosocomial-acquired COVID-19 patient characteristics, based on diagnostic interval of 2 days between admission and diagnostic testing.....</b> | <b>10</b> |

## Supplementary S1: List of participating centres

|                               |                                                                                                         |
|-------------------------------|---------------------------------------------------------------------------------------------------------|
| Aneurin Bevan Health Board    | Nevill Hall Hospital, Royal Gwent Hospital and Ysbyty Ystrad Fawr.                                      |
| Betsi Cadwalladr Health Board | Glan Clwyd Hospital, Wrexham Maelor Hospital and Ysbyty Gwynedd (Bangor).                               |
| Cardiff and Vale Health Board | University Hospital Llandough and University Hospital of Wales.                                         |
| Cwm Taf Health Board          | Prince Charles Hospital, Princess of Wales Hospital and Royal Glamorgan Hospital.                       |
| Hywel Dda Health Board        | Bronglais Hospital, Glangwili General Hospital, Prince Phillip Hospital and Withybush General Hospital. |
| Swansea Bay Health Board      | Morrison Hospital, Singleton Hospital and Neath Port Talbot Hospital.                                   |

All hospitals delivered urgent and emergency care to patients diagnosed with covid-19.

## Supplementary S2: Commonly used case definitions for probable covid-19 origin.

Date of first positive SARS-CoV-2 PCR-testing used in all cases.

|                                       | <b>Case definition</b>                                                                                                                                   | <b>Probable covid-19 origin</b>      |
|---------------------------------------|----------------------------------------------------------------------------------------------------------------------------------------------------------|--------------------------------------|
| COPE study investigators <sup>1</sup> | Positive SARS-CoV-2 test taken prior to or within first 5 days of admission                                                                              | Community-acquired covid-19 ("CAC")  |
|                                       | Positive SARS-CoV-2 test taken between 5-14 days after admission                                                                                         | Probable Community-acquired          |
|                                       | Positive SARS-CoV-2 test taken more than 14 days after hospital admission<br>( <i>patient required to remain an inpatient on date of swab sampling</i> ) | Hospital-acquired (Nosocomial- "NC") |
|                                       |                                                                                                                                                          |                                      |
| Public Health England                 | Positive SARS-CoV-2 test taken after 7 days of hospital admission                                                                                        | Probable Nosocomial covid-19         |
|                                       |                                                                                                                                                          |                                      |
| Public Health Wales                   | Positive SARS-CoV-2 test taken and no hospital admission within 28 days or within 2 days of hospital admission                                           | Community onset                      |
|                                       | Positive SARS-CoV-2 test taken more than 2 days and less than 8 days from hospital admission                                                             | Indeterminate hospital onset         |
|                                       | Positive SARS-CoV-2 test taken more than 7 days and less than 15 days from hospital admission                                                            | Probable hospital onset              |
|                                       | Positive SARS-CoV-2 test taken more than 14 days from hospital admission                                                                                 | Definite hospital onset              |

<sup>1</sup> Carter B, Collins JT, Barlow-Pay F, et al. Nosocomial COVID-19 infection: examining the risk of mortality. The COPE-Nosocomial Study (COVID in Older PEople). *Journal of Hospital Infection* 2020; **106**(2): 376-84.

## Supplementary S3: Study flowchart

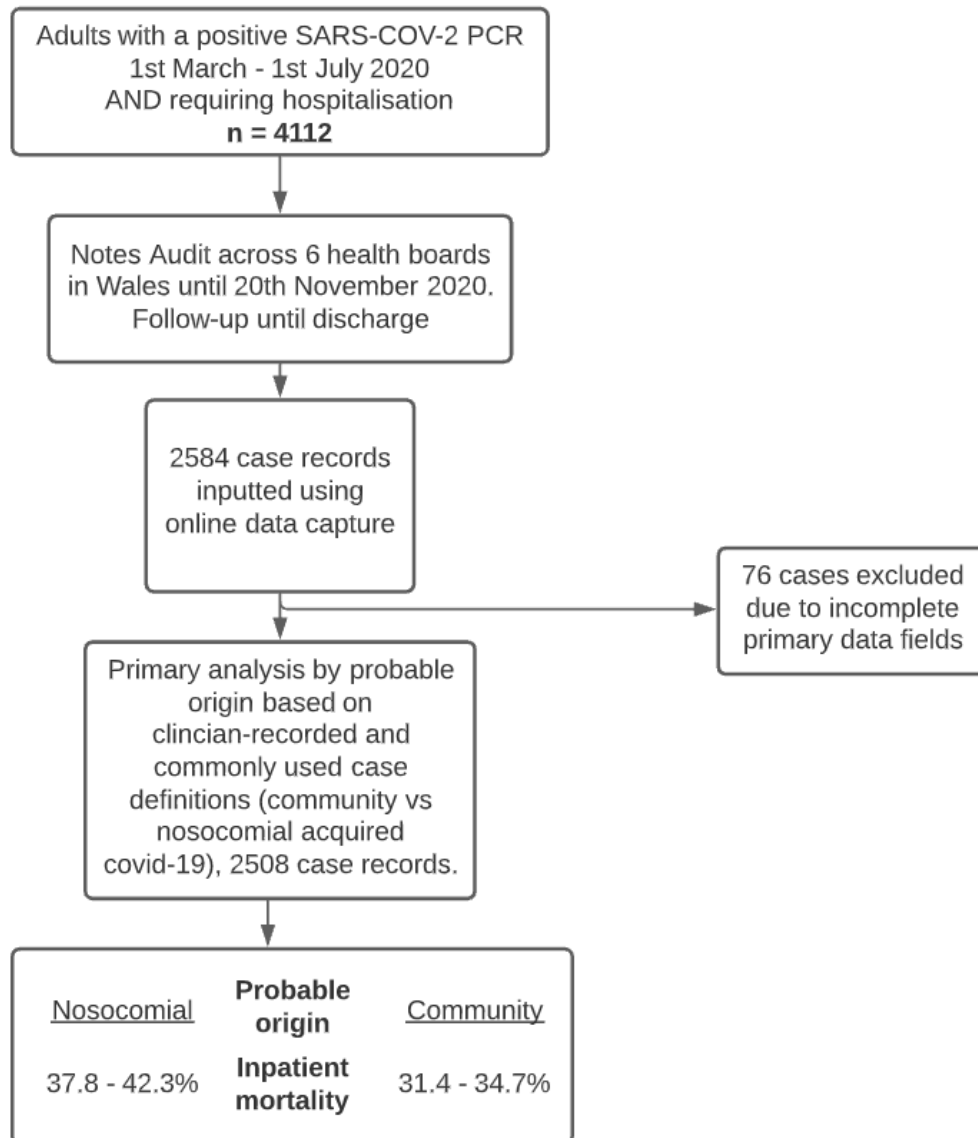

## Supplementary S4: Monthly prevalence of nosocomial infection diagnosis

| Month (2020) | Total recorded cases | COPE/ Public Health Wales case definition* | Clinician-recoded diagnosis |
|--------------|----------------------|--------------------------------------------|-----------------------------|
|              |                      | 'Definite' nosocomial (%)                  | Hospital-acquired (%)       |
| March        | 677                  | 96 (14.2%)                                 | 117 (17.3%)                 |
| April        | 1348                 | 215 (15.9%)                                | 224 (16.6%)                 |
| May          | 346                  | 73 (21.1%)                                 | 67 (19.3%)                  |
| June         | 135                  | 25 (18.5%)                                 | 26 (19.3%)                  |

\*Defined by diagnostic PCR testing performed >14 days following hospital admission.

## Supplementary S5: Random effects model for relative risk of mortality by covid-19 origin and site

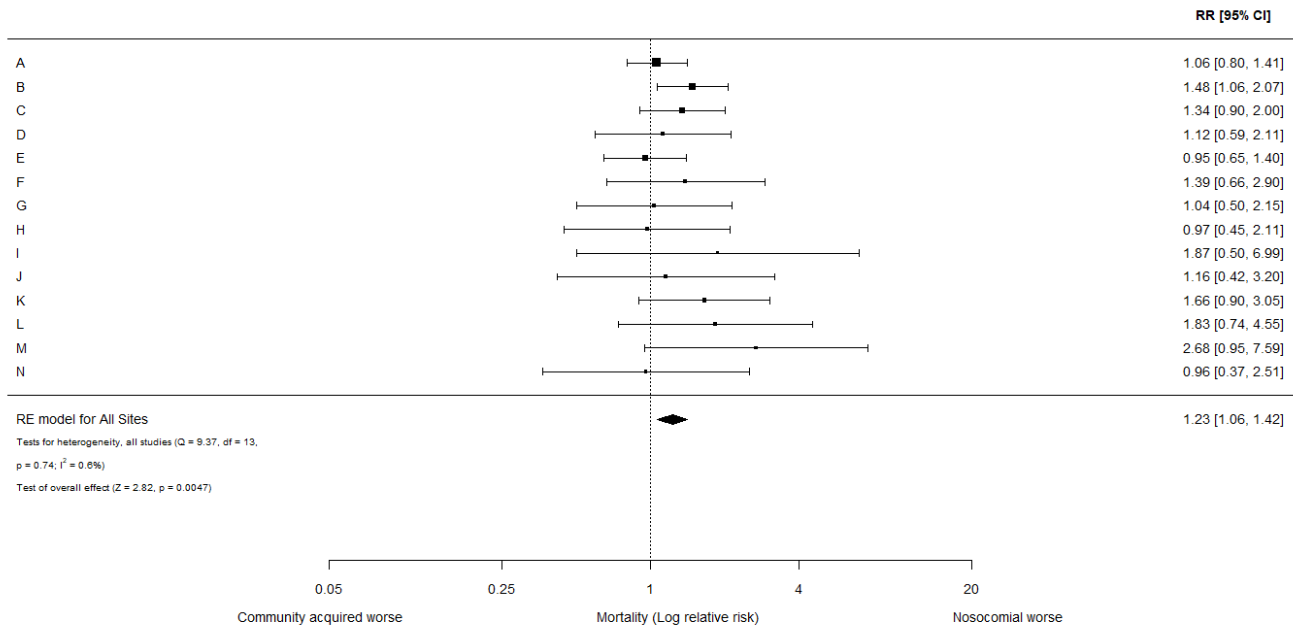

Forest plot assessing the relative risk (RR) and 95% confidence interval (95% CI) of mortality in adults hospitalised with community-acquired and nosocomial covid-19, based on the COPE study definitions<sup>1</sup>. The size of each box is proportional to the size of the individual hospital site (A-N), with the error bars representing the 95% CIs. The diamond represents the pooled average across sites, based on a random effects (RE) model. Small sites not reporting mortality in both patient groups were excluded from analysis.  $I^2$ : heterogeneity variance, calculated using random effects maximum likelihood (REML) and metafor package in R.

## Supplementary S6: Mortality by age-group and covid-19 infection source

| <b>Age group (years)</b> | <b>Probable covid-19 origin*</b> | <b>Death</b> | <b>Discharged</b> | <b>Mortality (%)</b> | <b>Total cases</b> |
|--------------------------|----------------------------------|--------------|-------------------|----------------------|--------------------|
| <65                      | Community                        | 91           | 564               | 13.9                 | 655                |
| <65                      | Nosocomial                       | 7            | 44                | 13.7                 | 51                 |
| 65-74                    | Community                        | 124          | 197               | 38.6                 | 321                |
| 65-74                    | Nosocomial                       | 36           | 56                | 39.1                 | 92                 |
| 75-84                    | Community                        | 175          | 211               | 45.3                 | 386                |
| 75-84                    | Nosocomial                       | 56           | 73                | 43.4                 | 129                |
| 85+                      | Community                        | 118          | 14                | 48.8                 | 242                |
| 85+                      | Nosocomial                       | 62           | 77                | 44.6                 | 139                |

Probable origin as defined by COPE study investigators, see S2.

Supplementary S7: Effect of varying diagnostic cut-off on burden of nosocomial infection  
Sensitivity analysis to explore the effect of theoretical and current case definitions across the reported incubation period of SARS-CoV-2 virus. Diagnostic cut-off refers to the number of days elapsed between admission and a positive SARS-CoV-2 test being taken. An interval greater than this threshold is used to define nosocomial covid-19, and an interval less than the threshold community-acquired covid-19.

| DIAGNOSTIC CUT-OFF | PROBABLE ORIGIN | DIED | DISCHARGED | TOTAL | MORTALITY (%) |
|--------------------|-----------------|------|------------|-------|---------------|
| >2                 | Nosocomial      | 407  | 591        | 998   | 40.8          |
| ≤2                 | Community       | 478  | 1032       | 1510  | 31.7          |
| >3                 | Nosocomial      | 391  | 554        | 945   | 41.4          |
| ≤3                 | Community       | 494  | 1069       | 1563  | 31.6          |
| >4                 | Nosocomial      | 377  | 515        | 892   | 42.3          |
| ≤4                 | Community       | 508  | 1108       | 1616  | 31.4          |
| >5                 | Nosocomial      | 341  | 486        | 827   | 41.2          |
| ≤5                 | Community       | 544  | 1137       | 1681  | 32.4          |
| >6                 | Nosocomial      | 317  | 451        | 768   | 41.3          |
| ≤6                 | Community       | 568  | 1172       | 1740  | 32.6          |
| >7                 | Nosocomial      | 300  | 424        | 724   | 41.4          |
| ≤7                 | Community       | 585  | 1199       | 1784  | 32.8          |
| >8                 | Nosocomial      | 279  | 392        | 671   | 41.6          |
| ≤8                 | Community       | 606  | 1231       | 1837  | 33.0          |
| >9                 | Nosocomial      | 251  | 366        | 617   | 40.7          |
| ≤9                 | Community       | 634  | 1257       | 1891  | 33.5          |
| >10                | Nosocomial      | 228  | 346        | 574   | 39.7          |
| ≤10                | Community       | 657  | 1277       | 1934  | 34.0          |
| >11                | Nosocomial      | 207  | 328        | 535   | 38.7          |
| ≤11                | Community       | 678  | 1295       | 1973  | 34.4          |
| >12                | Nosocomial      | 186  | 306        | 492   | 37.8          |
| ≤12                | Community       | 699  | 1317       | 2016  | 34.7          |
| >13                | Nosocomial      | 173  | 282        | 455   | 38.0          |
| ≤13                | Community       | 712  | 1341       | 2053  | 34.7          |
| >14                | Nosocomial      | 168  | 263        | 431   | 39.0          |
| ≤14                | Community       | 717  | 1360       | 2077  | 34.5          |
| >15                | Nosocomial      | 164  | 257        | 421   | 39.0          |
| ≤15                | Community       | 721  | 1366       | 2087  | 34.5          |



Supplementary S8: Effect of varying case definitions on prevalence and crude mortality rate for community- and nosocomial- SARS-CoV-2 infection.

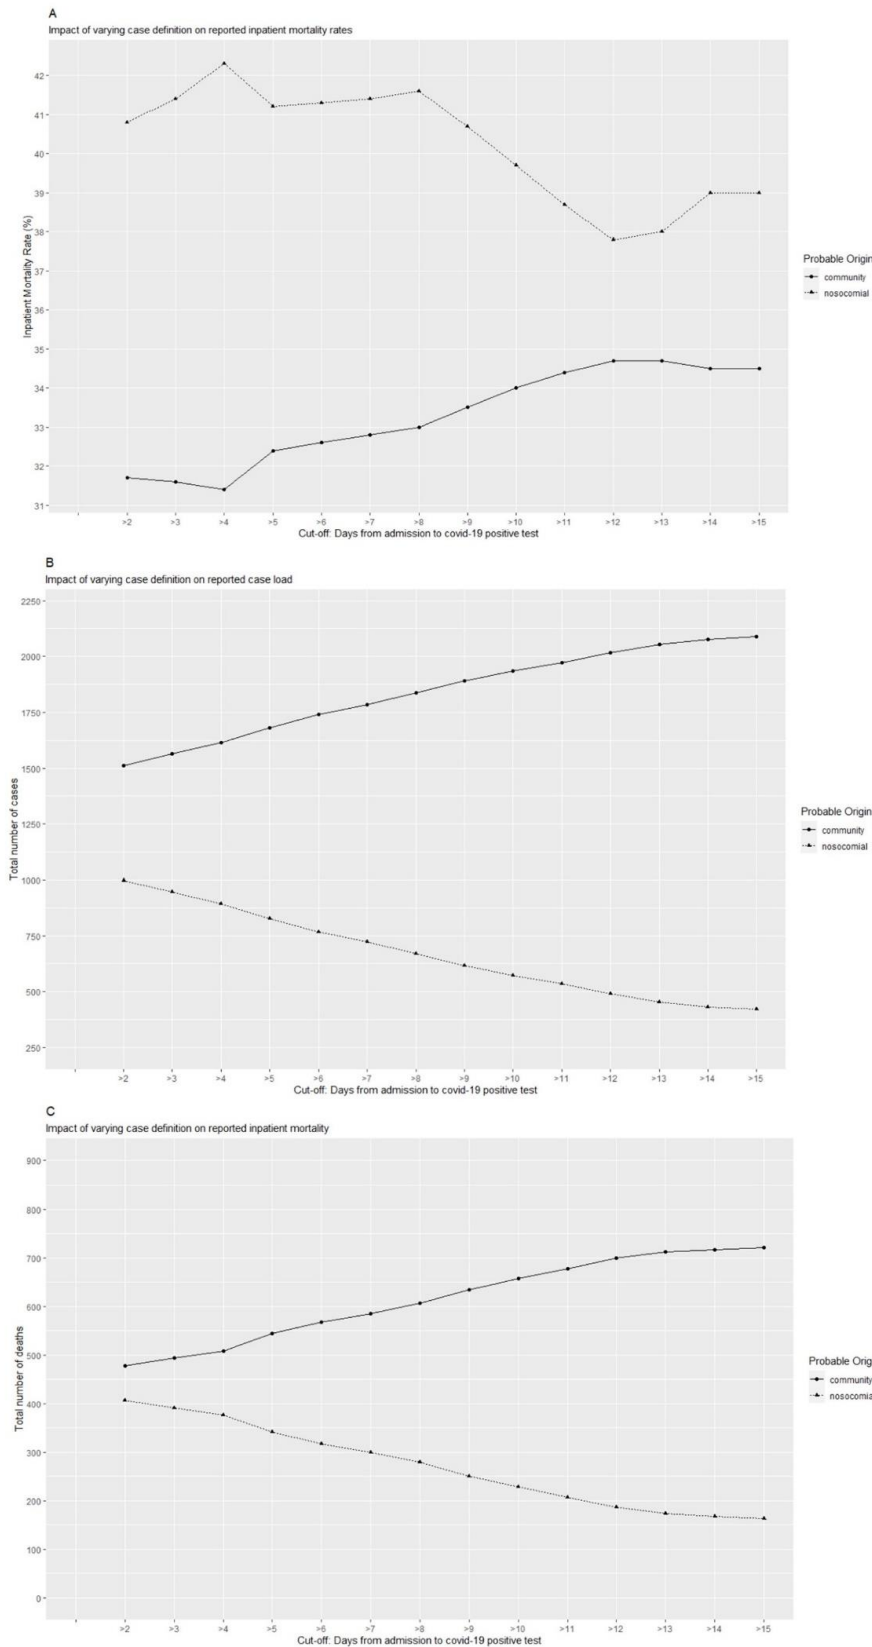

*Sensitivity analyses considering the effect on inpatient mortality rate (A), total case numbers (B), and overall mortality burden (C), by varying the case definition across the incubation period, taking admission as the earliest potential nosocomial exposure.*

Supplementary S9: Comparison of community-acquired and nosocomial-acquired COVID-19 patient characteristics, based on diagnostic interval of 2 days between admission and diagnostic testing

| <b>Variable, median (IQR)</b>       | <b>Diagnosed prior to 2-days post admission<br/>"Community-acquired"</b> | <b>Diagnosed after first 48 hours of admission<br/>"Nosocomial-acquired"</b> | <b>Univariate Significance</b> |
|-------------------------------------|--------------------------------------------------------------------------|------------------------------------------------------------------------------|--------------------------------|
| N                                   | 1510 (60.2%)                                                             | 998 (39.8%)                                                                  | -                              |
| Female (n, %)                       | 661(43.8%)                                                               | 484(48.5%)                                                                   | 0.0224                         |
| Age, years                          | 69 (56-80)                                                               | 79 (71-87)                                                                   | <0.0001                        |
| Total co-morbidities count          | 2.0 (1.0-4.0)                                                            | 3.0 (2.0-4.0)                                                                | <0.0001                        |
| Clinical Frailty Scale              | 3 (2-6)<br><i>Data available in 862 cases (57%)</i>                      | 5 (4-7)<br><i>Data available in 443 cases (44%)</i>                          | <0.0001                        |
| Welsh index of multiple deprivation | 745 (374-1293)<br><i>Data available in 1438 cases (95%)</i>              | 772 (403-1310)<br><i>Data available in 947 cases (95%)</i>                   | 0.217                          |
